# Supplementary material for: Analysis of the genome sequence of the flowering plant Arabidopsis thaliana
Source: Springer Nature journal article supplement (doi:10.1038/35048692), 2000-12-01
Supplement: 41586_2000_BF35048692_MOESM2_ESM.pdf [file 41586_2000_BF35048692_MOESM2_ESM.pdf]

**Table 7: Receptor kinase families**

| RECEPTOR KINASE: KNOWN ARABIDOPSIS FAMILIES | Query Accession # | Kinase family members | non-kinase relatives |
|---------------------------------------------|-------------------|-----------------------|----------------------|
| Leucine-rich repeat RK                      | AAB58929.1        | 82                    | 122                  |
| Light-repressible RK                        | CAA66376.1        | 47                    | 12                   |
| Lectin RK                                   | CAA65153.1        | 38                    | 7                    |
| S-glycoprotein RK                           | AAA32786.1        | 34                    | 5                    |
| Massenet RK                                 | CAA18465.1        | 11                    | 5                    |
| Wall-associated RK                          | CAA08794.1        | 6                     | 0                    |
| PR5 RK                                      | AAC49208.1        | 3                     | 21                   |
| RKF2 RK                                     | AAC50044.1        | 1                     | 0                    |
| <b>TOTAL KNOWN FAMILY GENES</b>             |                   | <b>222</b>            | <b>172</b>           |
| <b>NEW FAMILIES</b>                         |                   |                       |                      |
| A                                           | AT4g39110         | 17                    |                      |
| B                                           | AT4g04570         | 16                    |                      |
| C                                           | T24D18_20         | 9                     |                      |
| D                                           | AT3g24400         | 7                     |                      |
| E                                           | AT4g21410         | 3                     |                      |
| F                                           | F1O19_1           | 3                     |                      |
| G                                           | F23O10_15         | 2                     |                      |
| H                                           | F11A6_5           | 2                     |                      |
| I                                           | AT3g19300         | 2                     |                      |
| J                                           | AT5g16000         | 2                     |                      |
| K                                           | AT5g10290         | 2                     |                      |
| L                                           | AT5g02070         | 2                     |                      |
| M                                           | T8E3_2            | 2                     |                      |
| <b>49 ADDITIONAL 1-GENE</b>                 |                   | <b>49</b>             |                      |
| <b>TOTAL ARABIDOPSIS RECEPTOR KINASES</b>   |                   | <b>340</b>            |                      |
